# Supplementary material for: Melatonin suppresses serum starvation-induced autophagy of ovarian granulosa cells in premature ovarian insufficiency
Source: PubMed Central journal article supplement (PMC9700896; doi:10.1186/s12905-022-02056-7), 2022-11-24

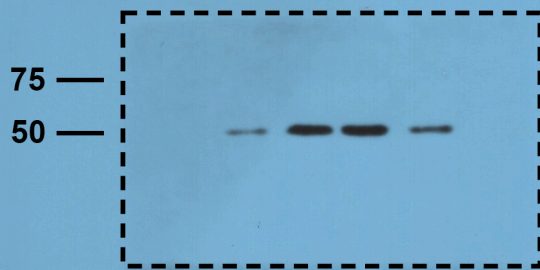

Beclin 1  
52 kDa

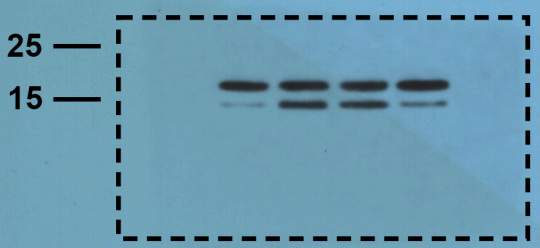

LC3 I  
LC3 II  
16 kDa  
14 kDa

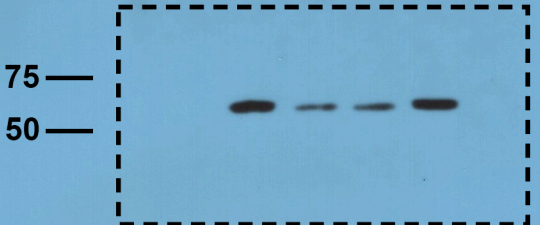

p62  
62 kDa

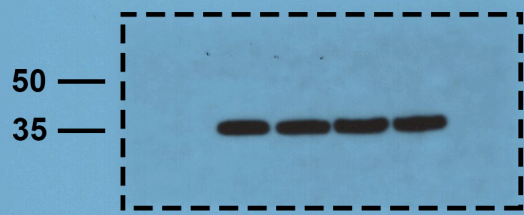

GAPDH  
37 kDa

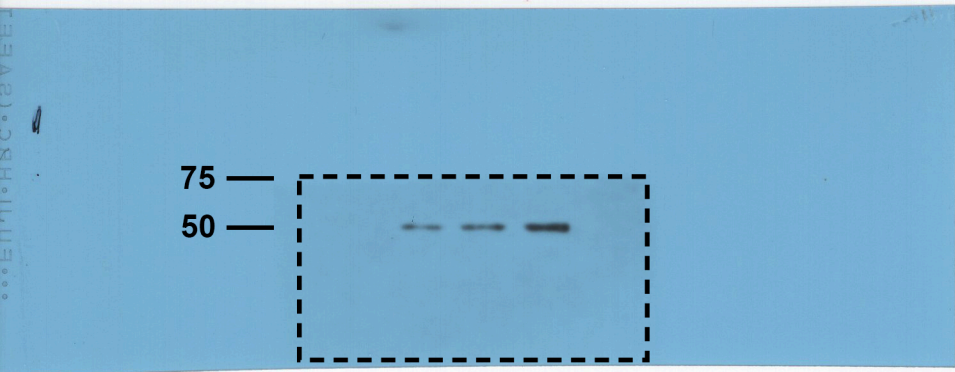

Beclin 1  
52 kDa

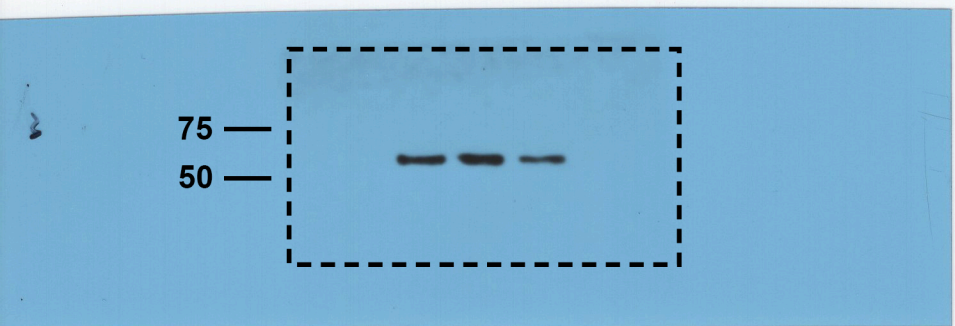

p62  
62 kDa

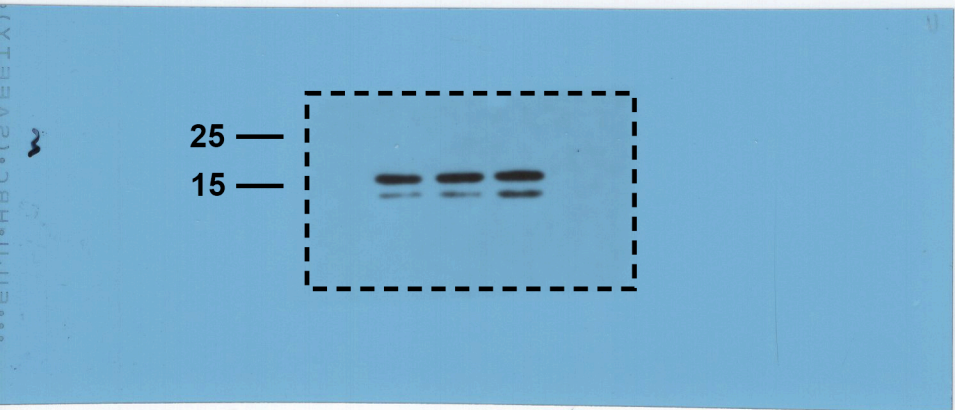

LC3 I  
LC3 II  
16 kDa  
14 kDa

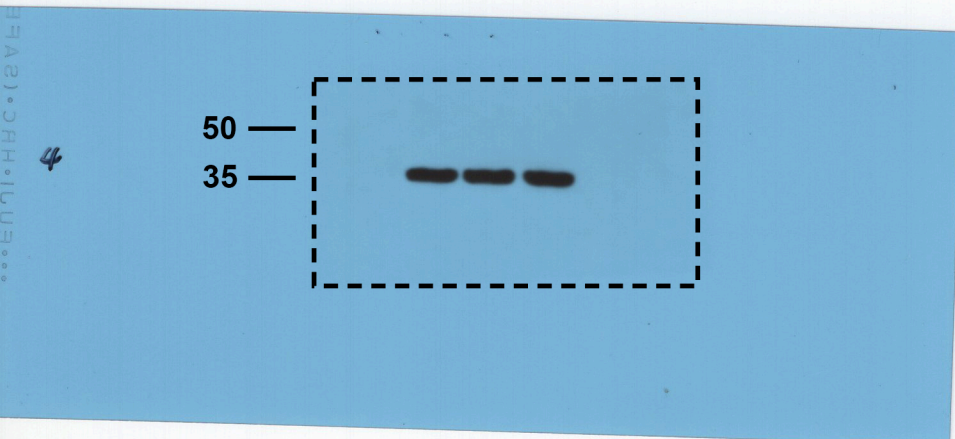

GAPDH  
37 kDa

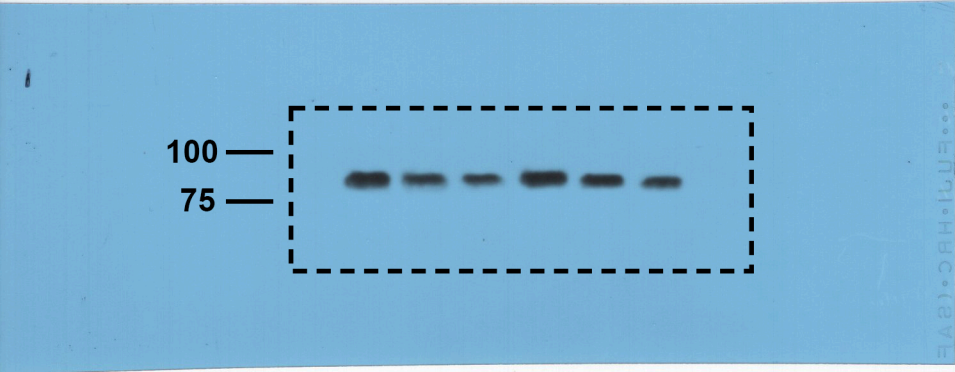

Stat3  
88 kDa

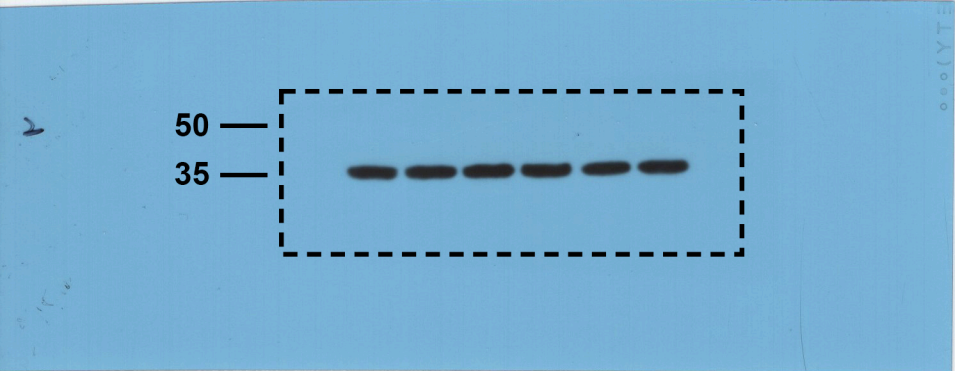

GAPDH  
37 kDa

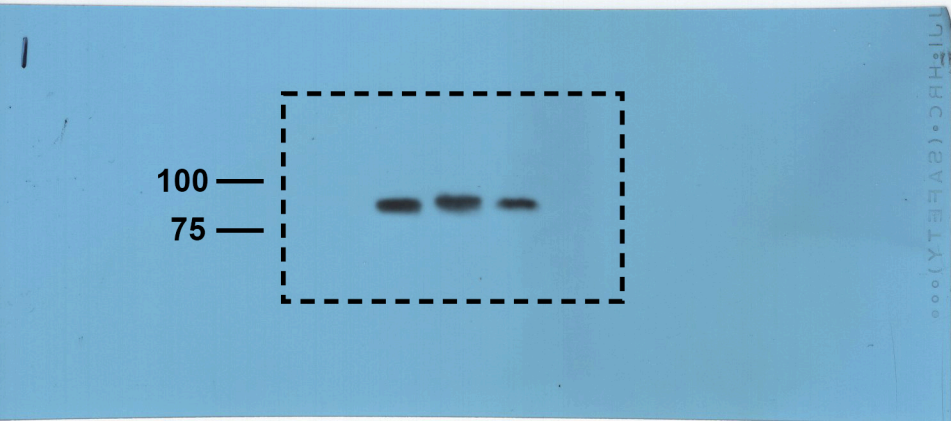

**Stat3**  
**88 kDa**

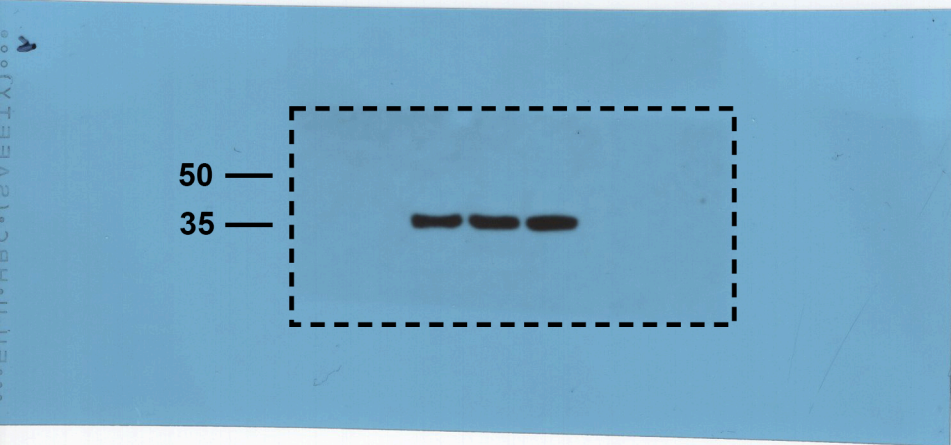

**GAPDH**  
**37 kDa**

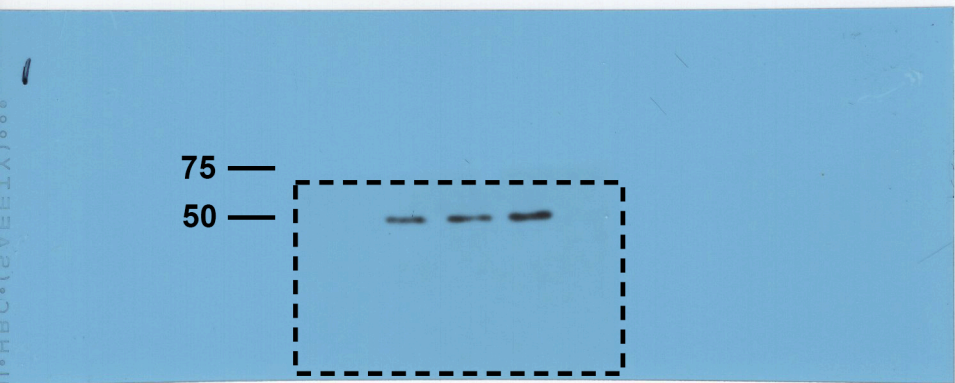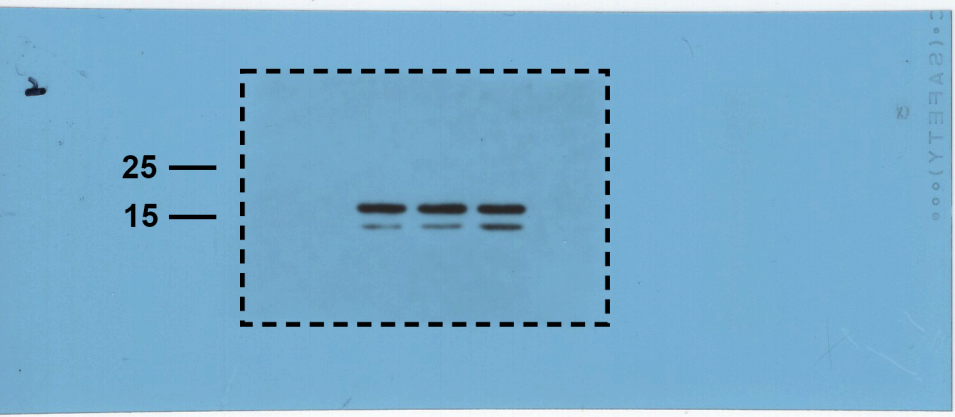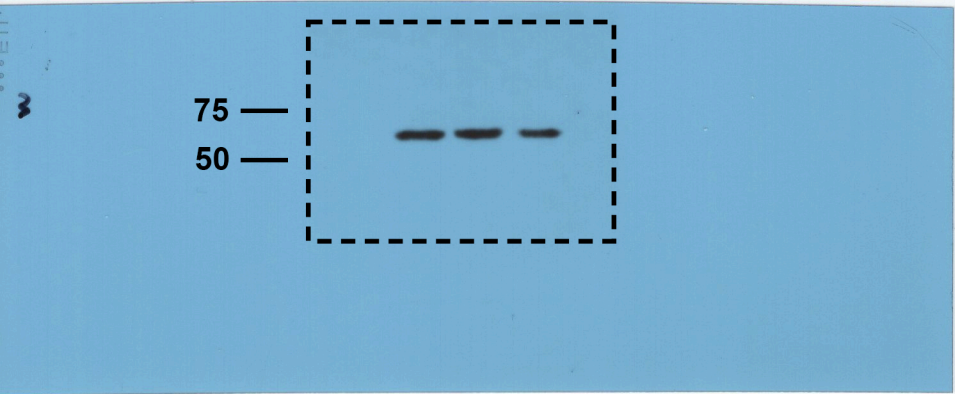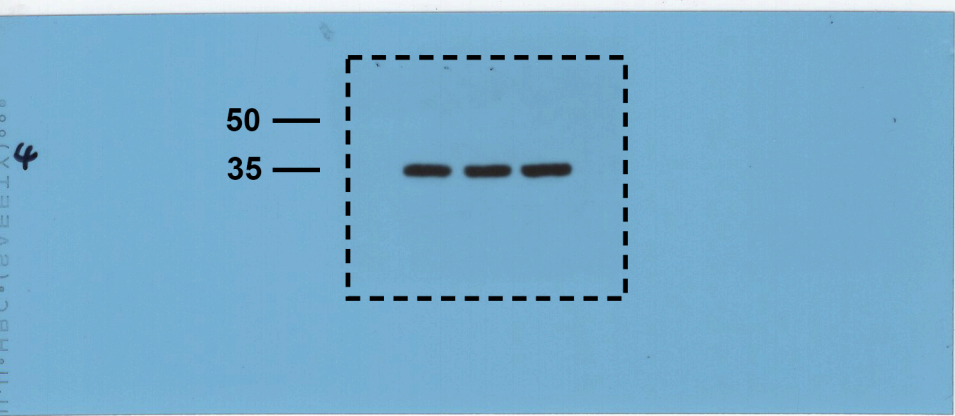

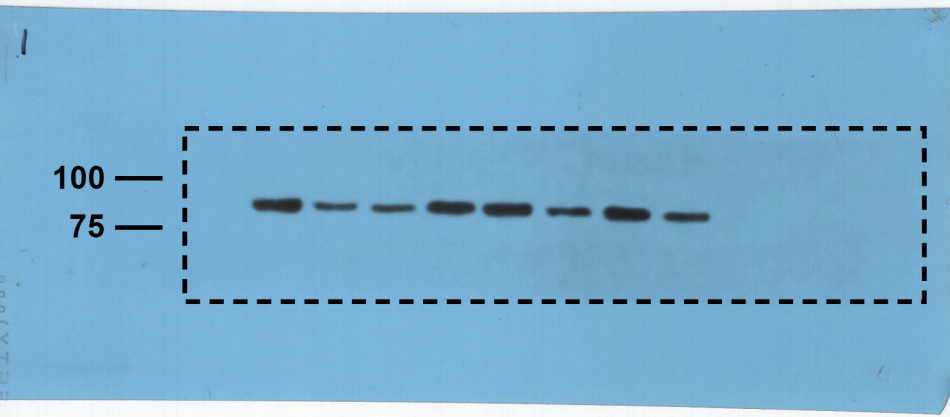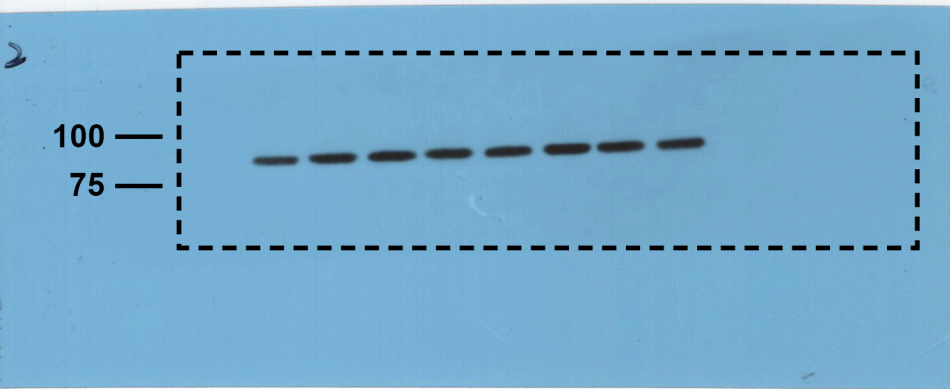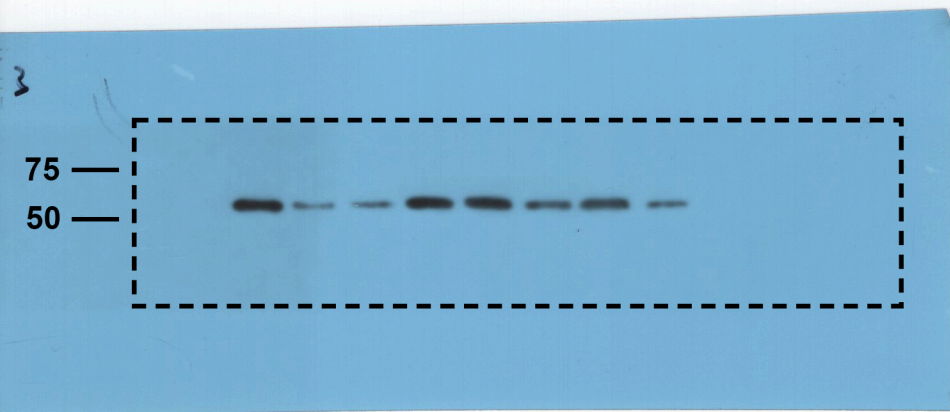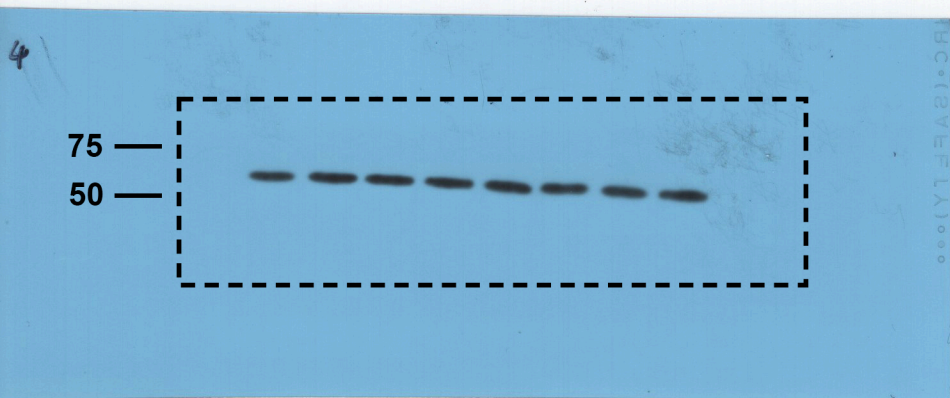

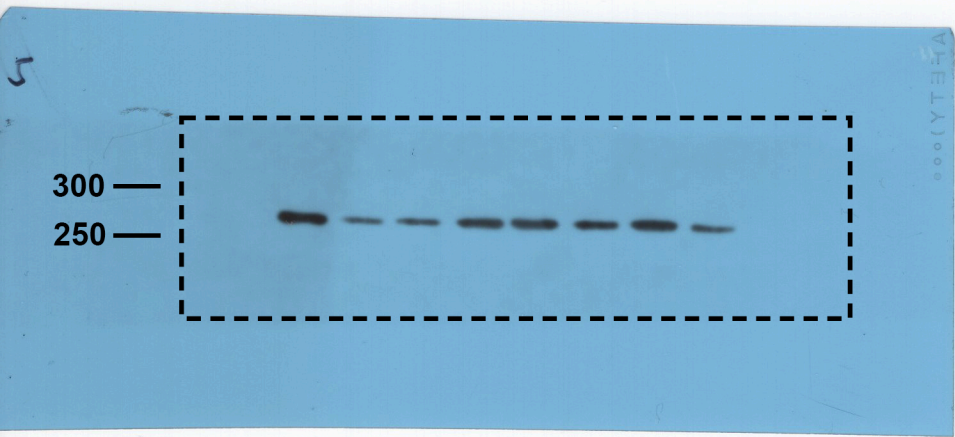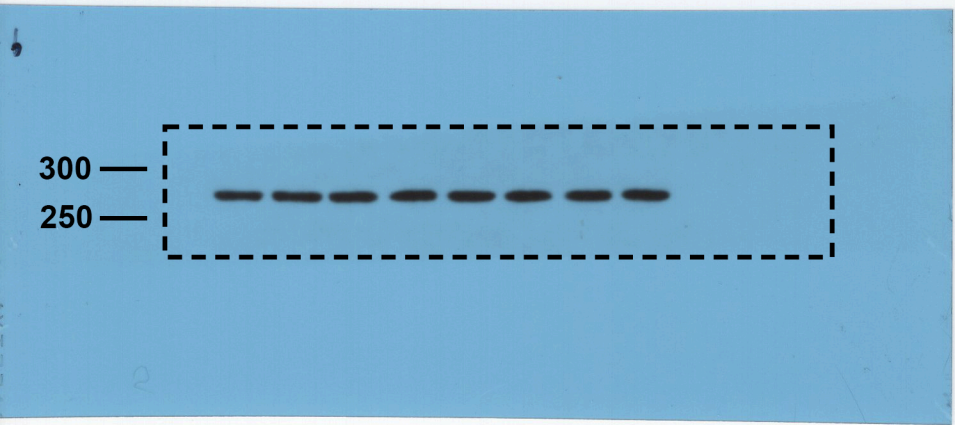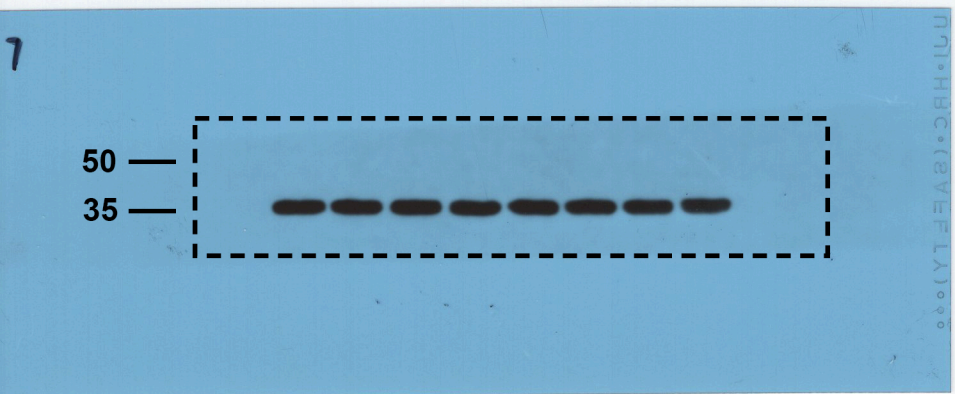

1

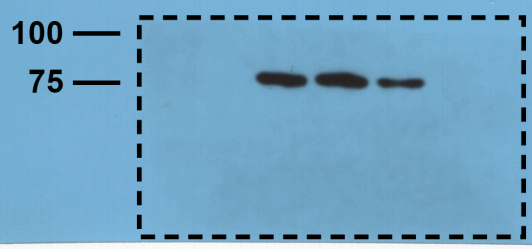

p-PI3K  
84 kDa

2

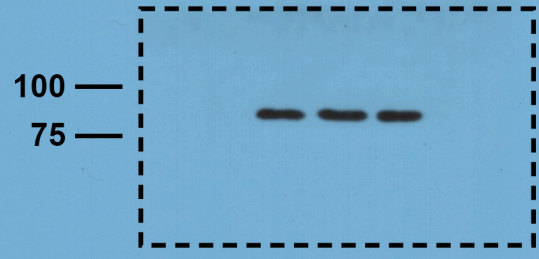

PI3K  
84 kDa

3

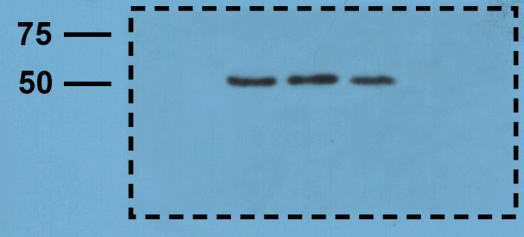

P-AKT  
56 kDa

6

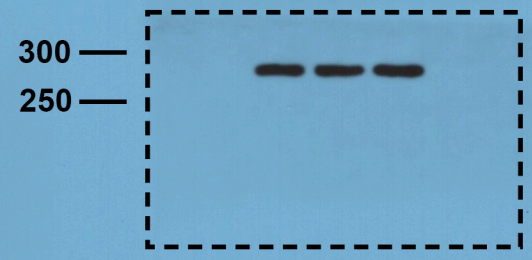

mTOR  
289 kDa



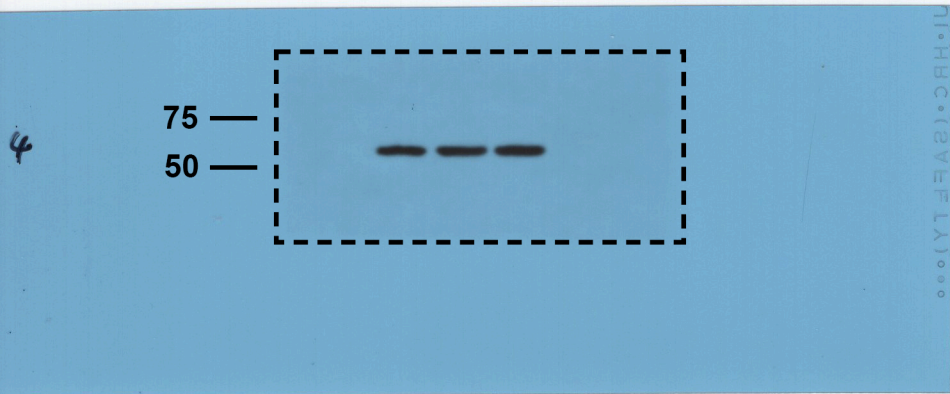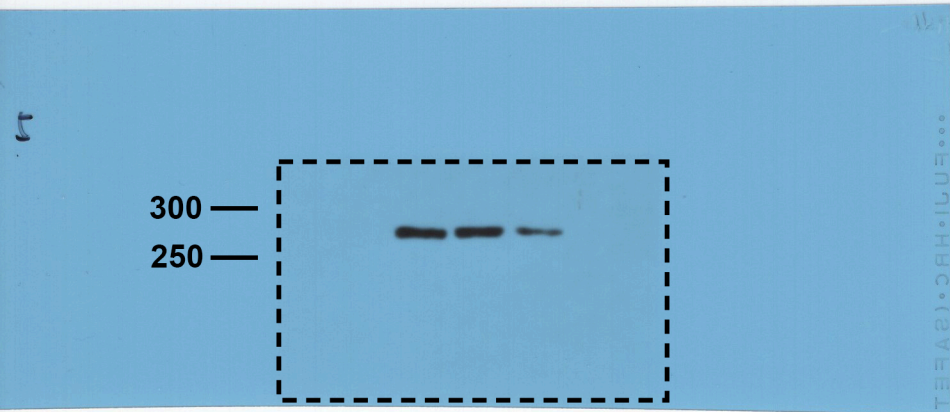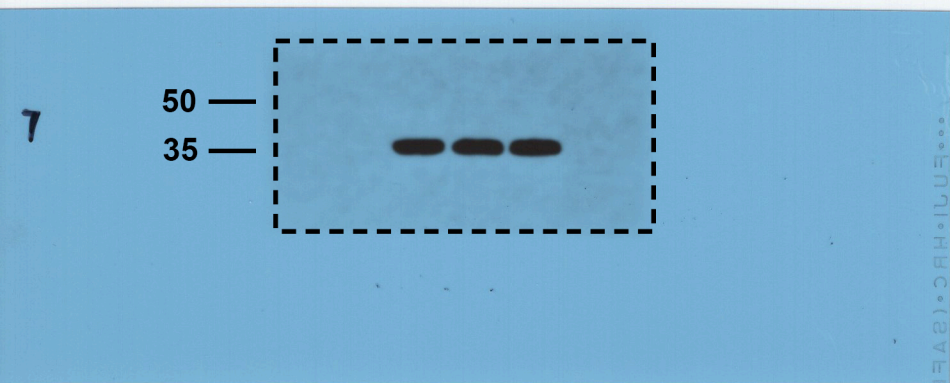

75 —  
50 —

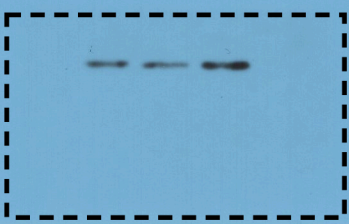

**Beclin 1**  
52 kDa

25 —  
15 —

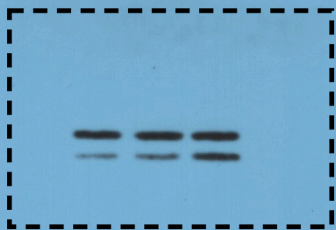

**LC3 I**  
**LC3 II**  
16 kDa  
14 kDa

75 —  
50 —

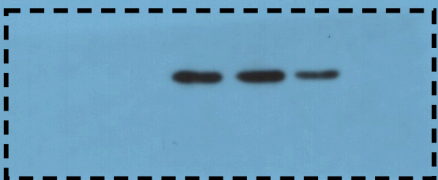

**p62**  
62 kDa

50 —  
35 —

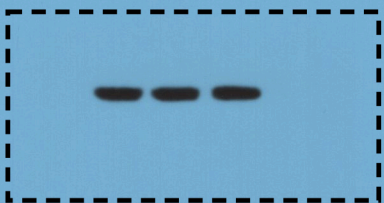

**GAPDH**  
37 kDa

75 —  
50 —

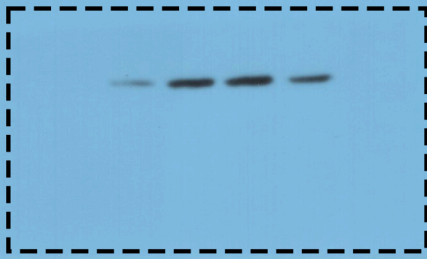

**Beclin 1**  
52 kDa

25 —  
15 —

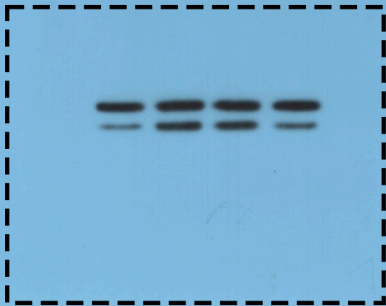

**LC3 I**  
**LC3 II**  
16 kDa  
14 kDa

75 —  
50 —

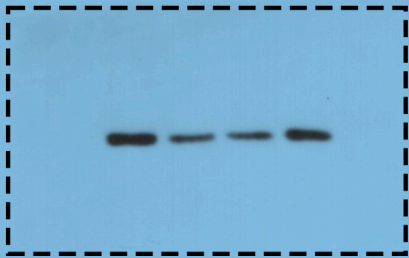

**p62**  
62 kDa

50 —  
35 —

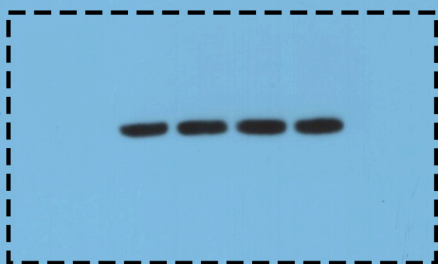

**GAPDH**  
37 kDa

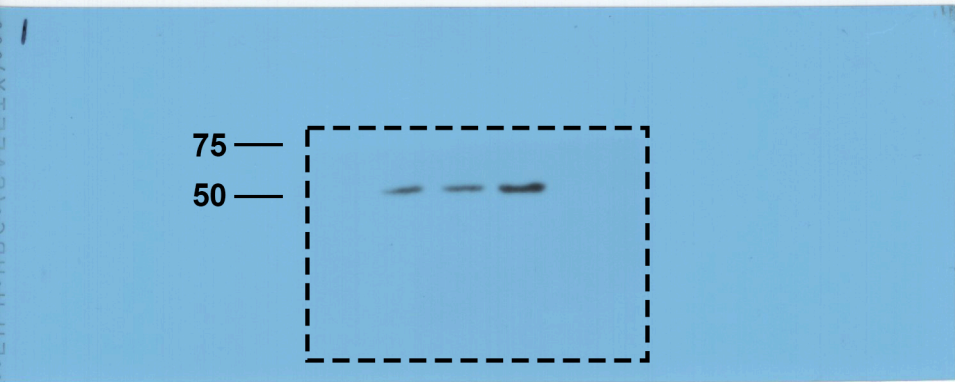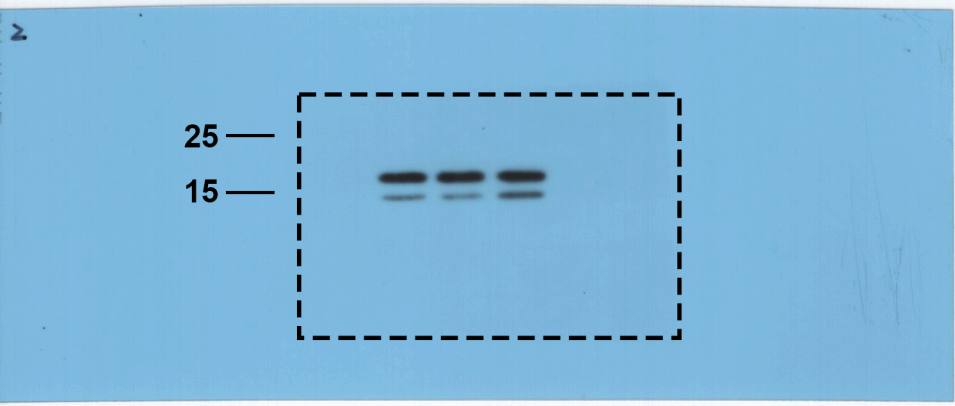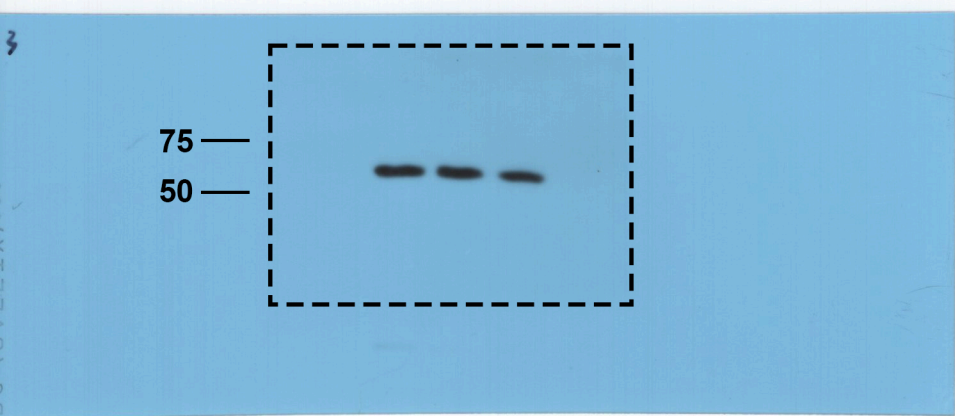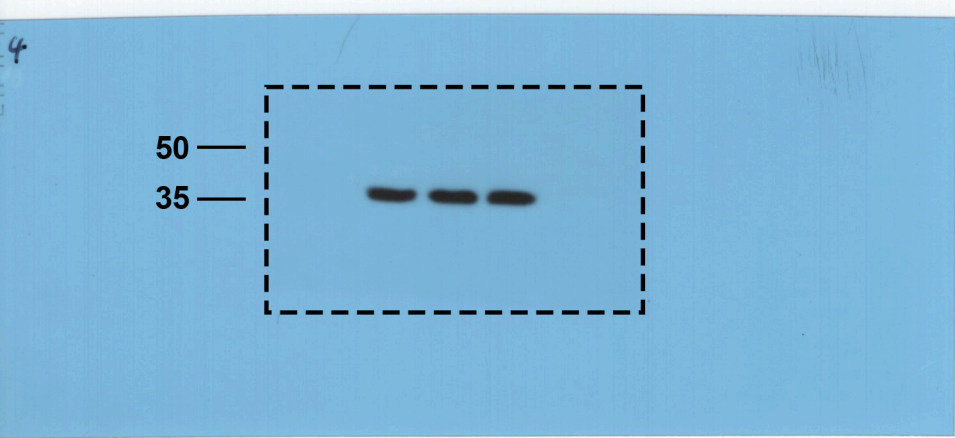

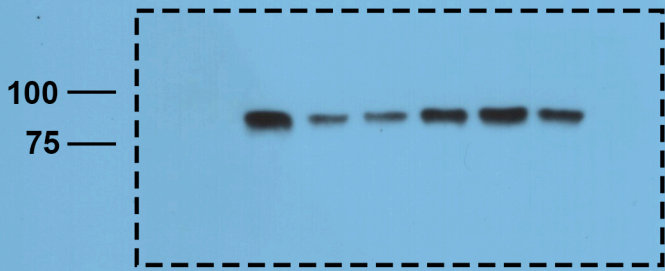

**Stat3**  
88 kDa

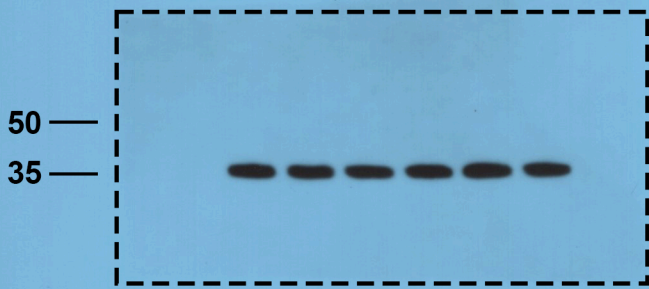

**GAPDH**  
37 kDa

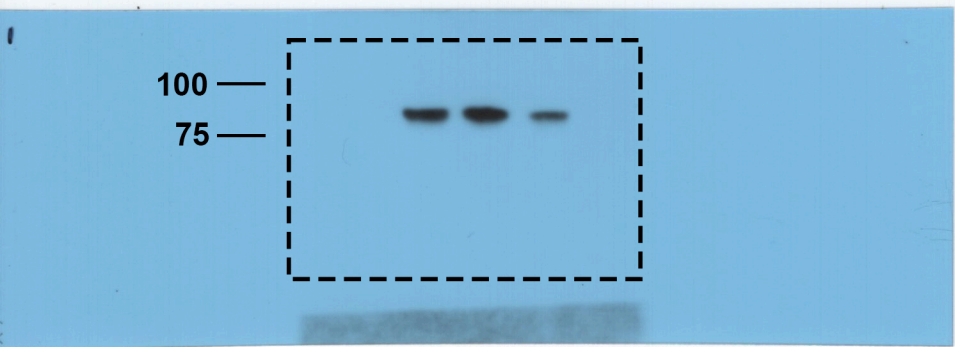

**Stat3**  
**88 kDa**

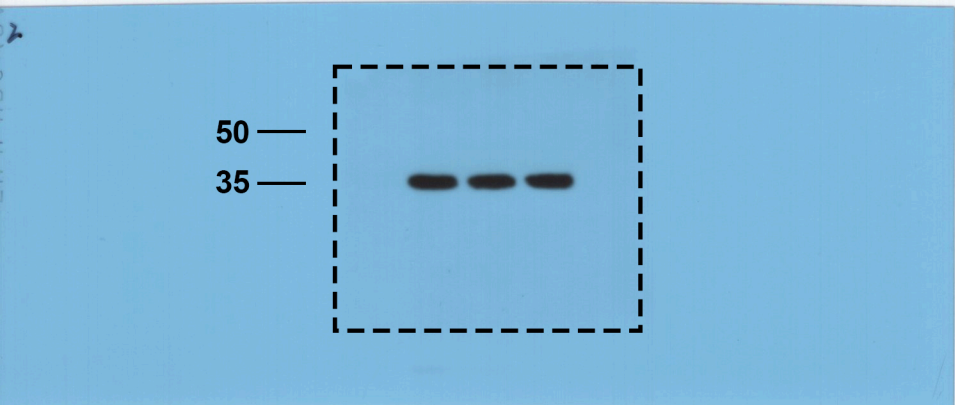

**GAPDH**  
**37 kDa**

75 —  
50 —

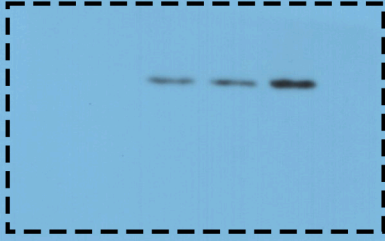

**Beclin 1**  
52 kDa

25 —  
15 —

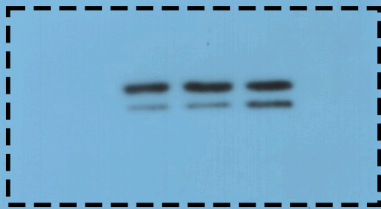

**LC3 I**  
**LC3 II**  
16 kDa  
14 kDa

75 —  
50 —

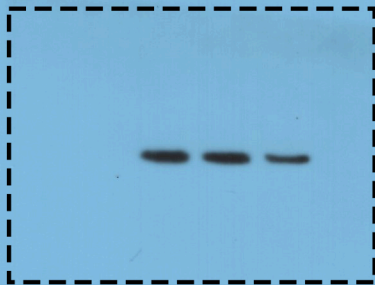

**p62**  
62 kDa

50 —  
35 —

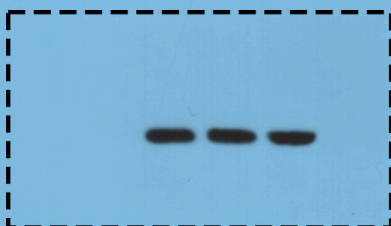

**GAPDH**  
37 kDa

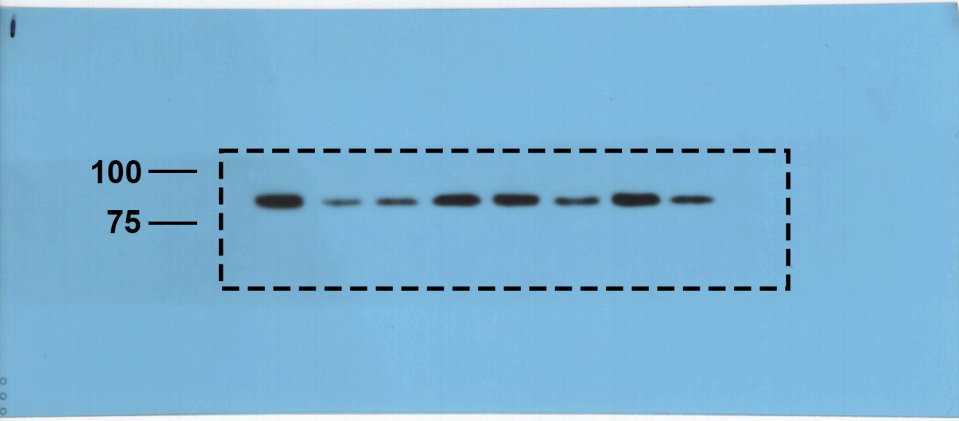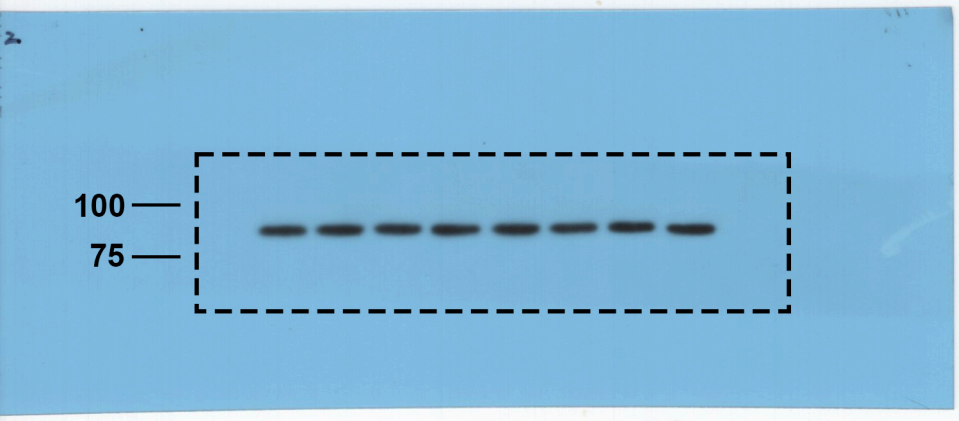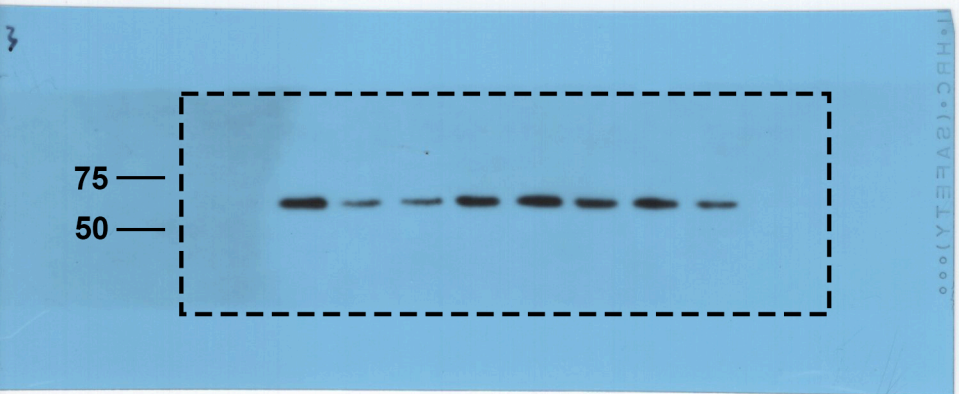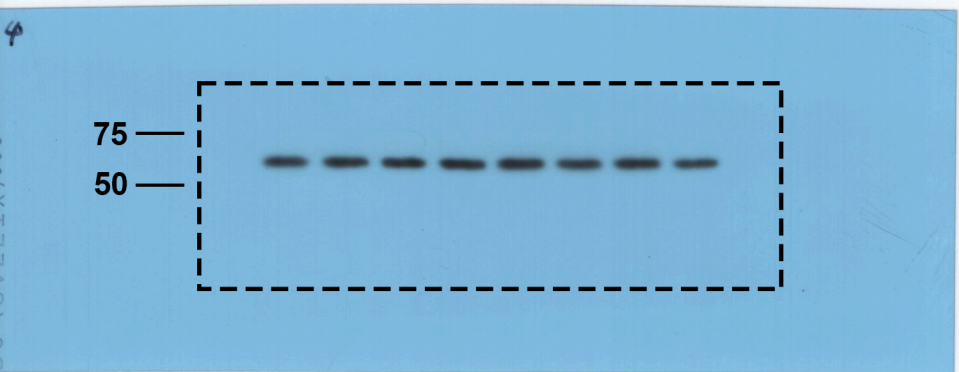



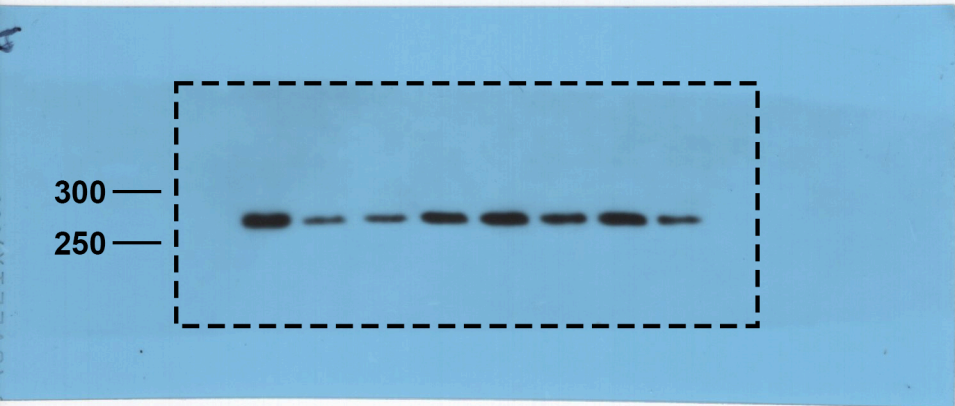

p-mTOR  
289 kDa

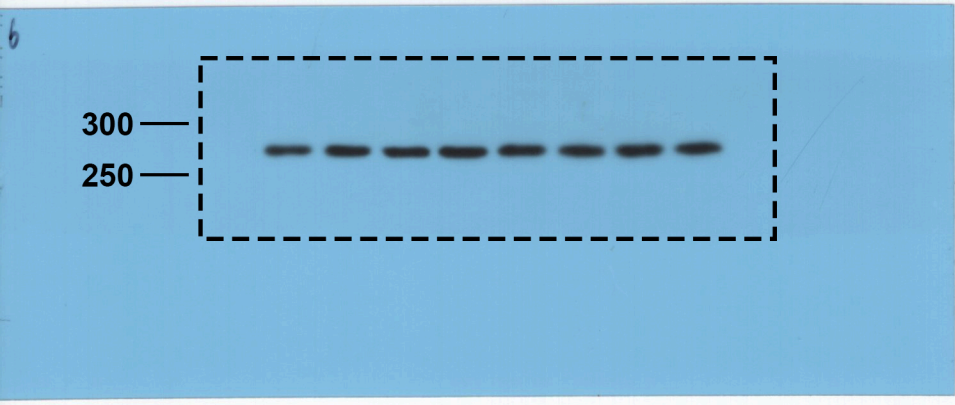

mTOR  
289 kDa

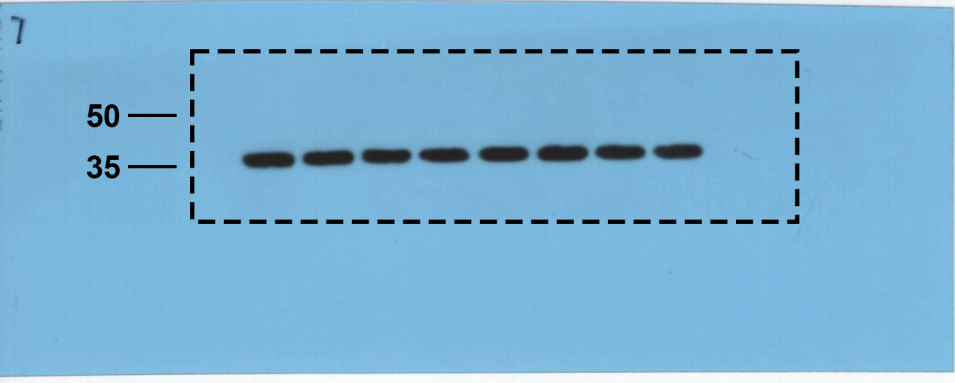

GAPDH  
37 kDa

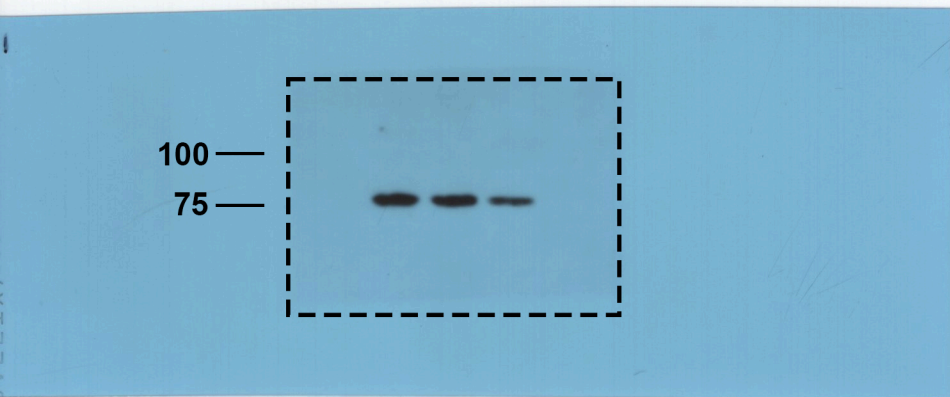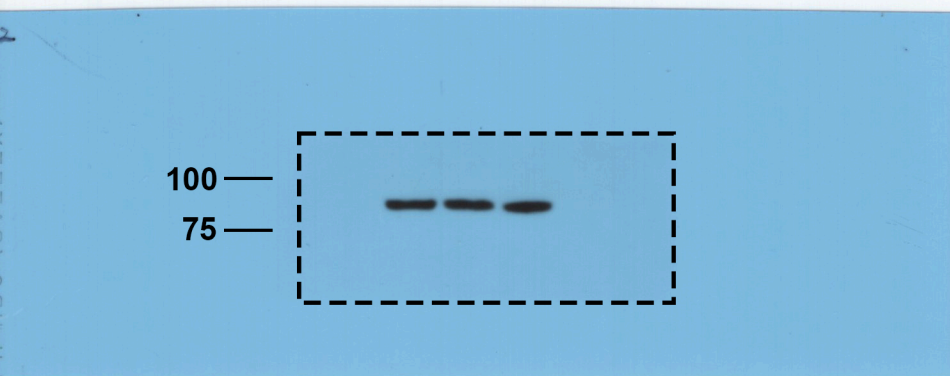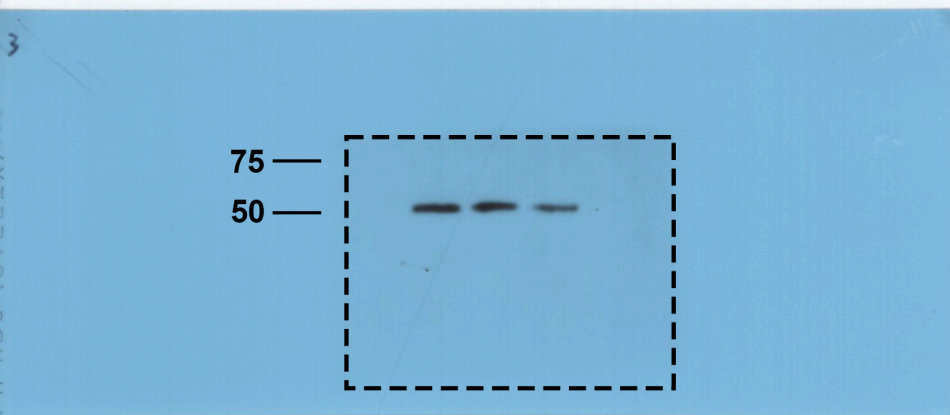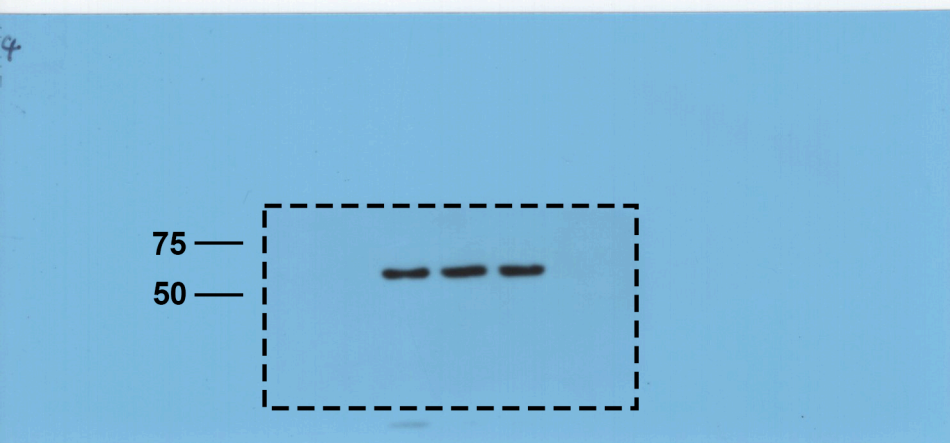

5

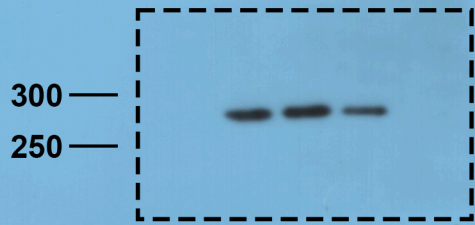

**p-mTOR**  
**289 kDa**

6

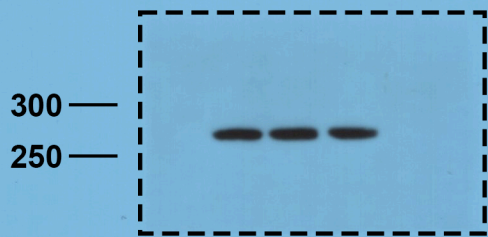

**mTOR**  
**289 kDa**

7

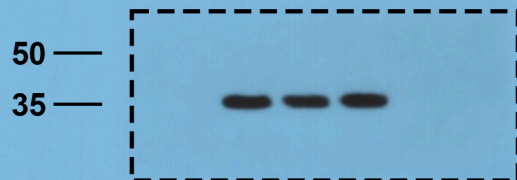

**GAPDH**  
**37 kDa**

75 —  
50 —

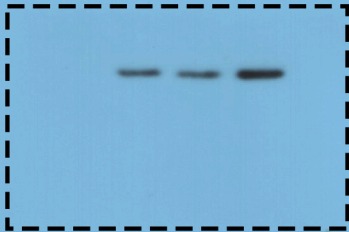

**Beclin 1**  
52 kDa

25 —  
15 —

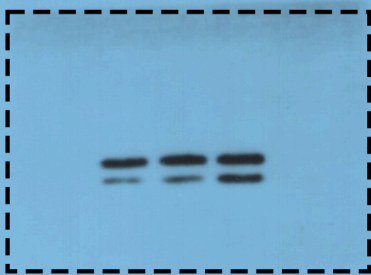

**LC3 I**  
**LC3 II**  
16 kDa  
14 kDa

75 —  
50 —

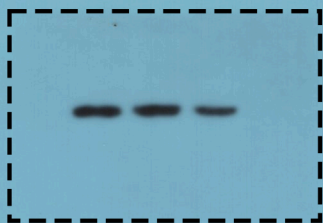

**p62**  
62 kDa

50 —  
35 —

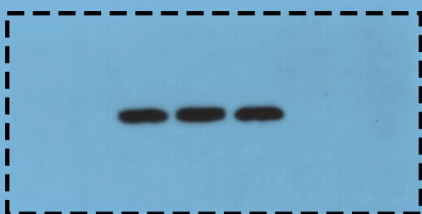

**GAPDH**  
37 kDa

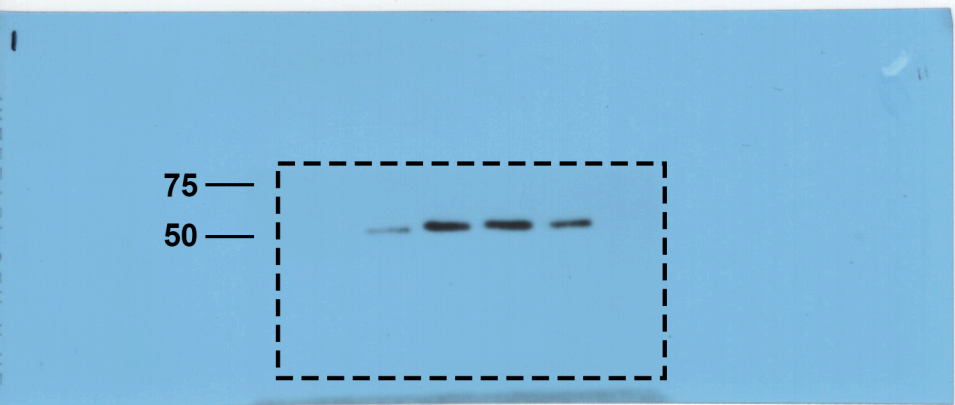

**Beclin 1**  
52 kDa

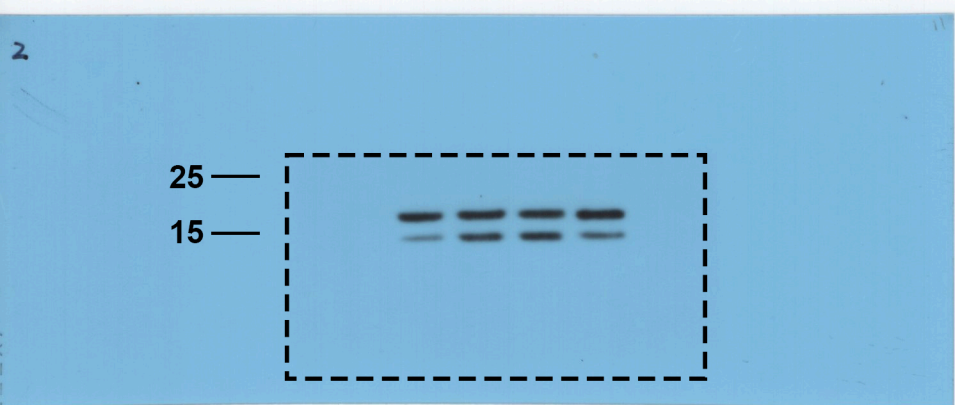

**LC3 I**  
**LC3 II**  
16 kDa  
14 kDa

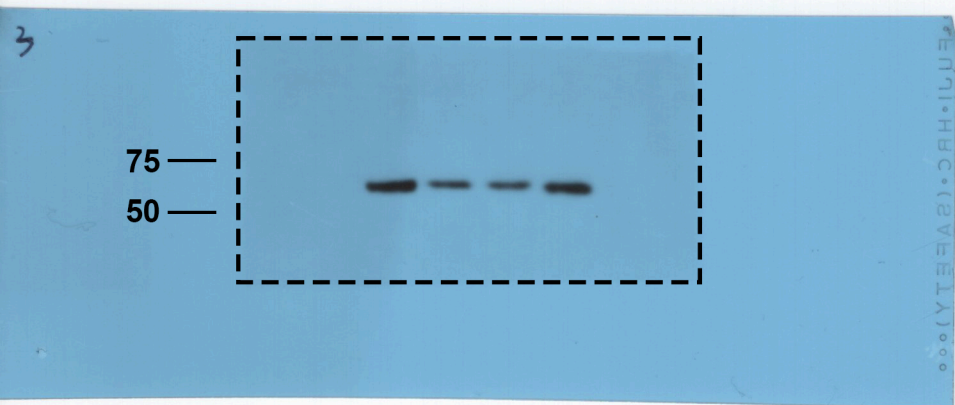

**p62**  
62 kDa

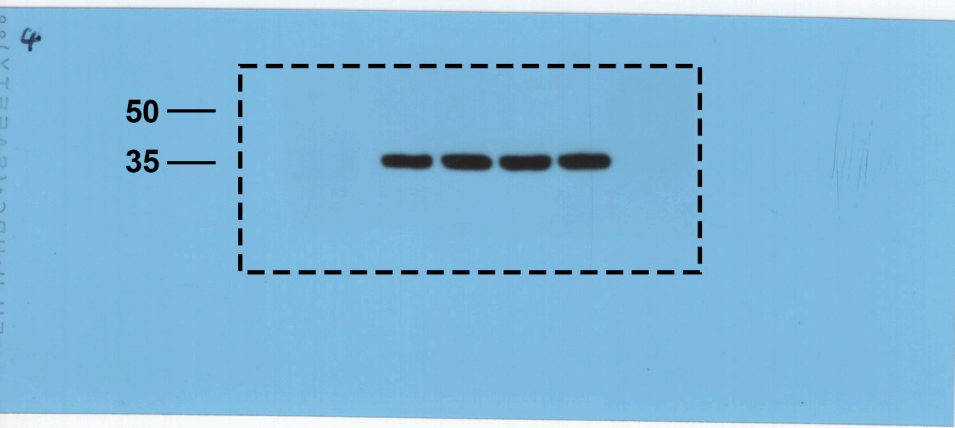

**GAPDH**  
37 kDa

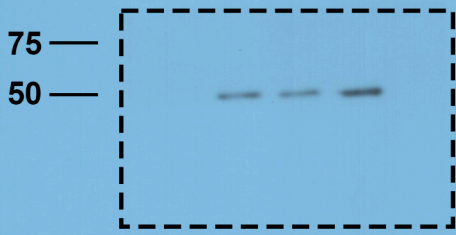

**Beclin 1**  
**52 kDa**

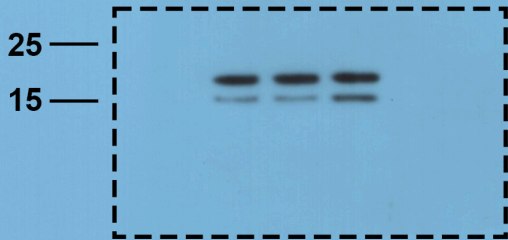

**LC3 I**  
**LC3 II**  
**16 kDa**  
**14 kDa**

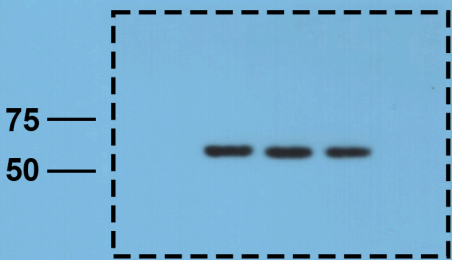

**p62**  
**62 kDa**

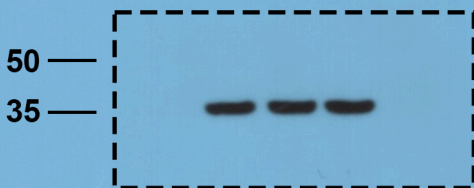

**GAPDH**  
**37 kDa**

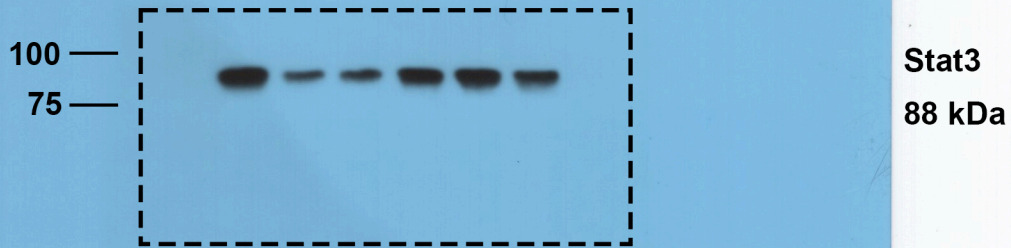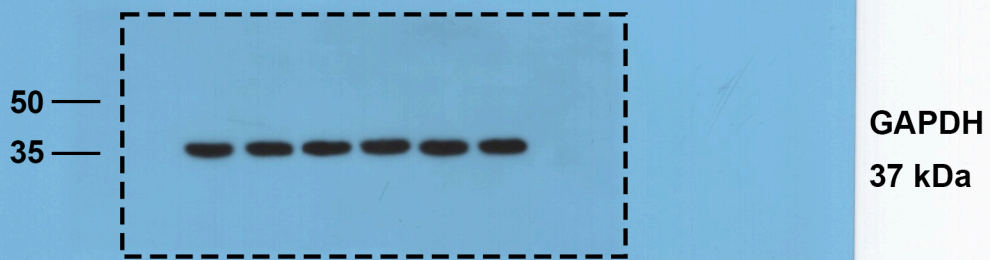

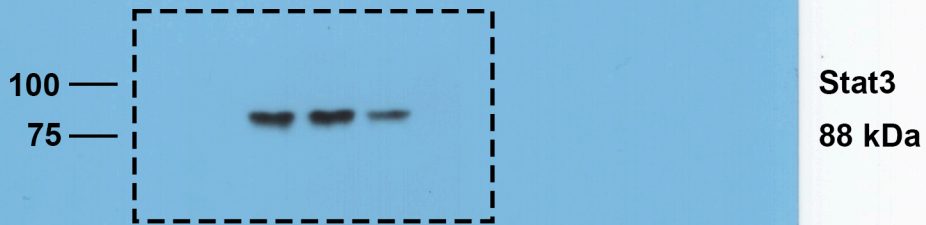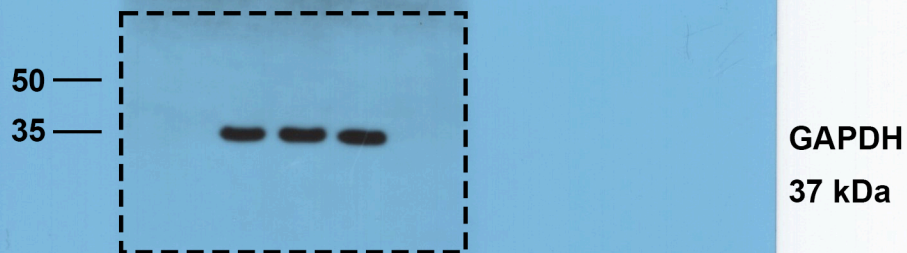



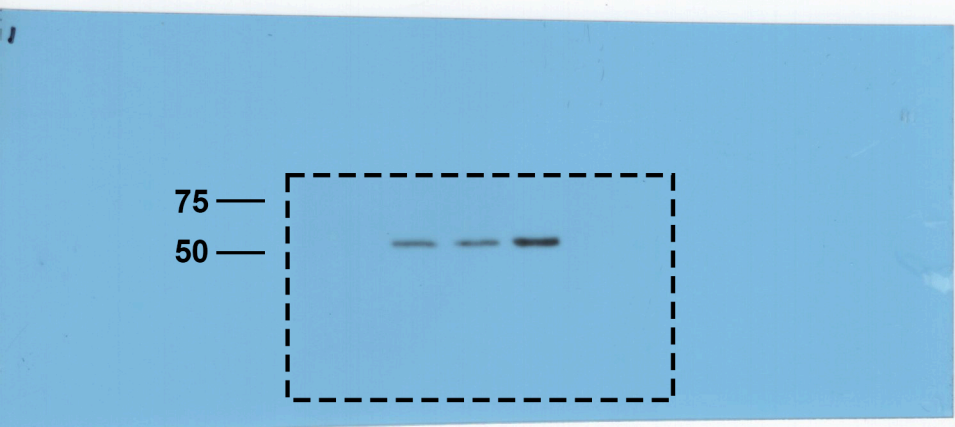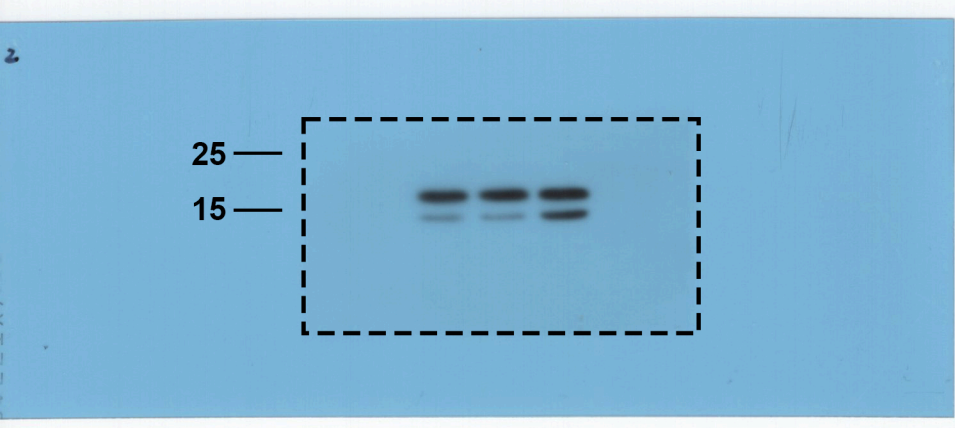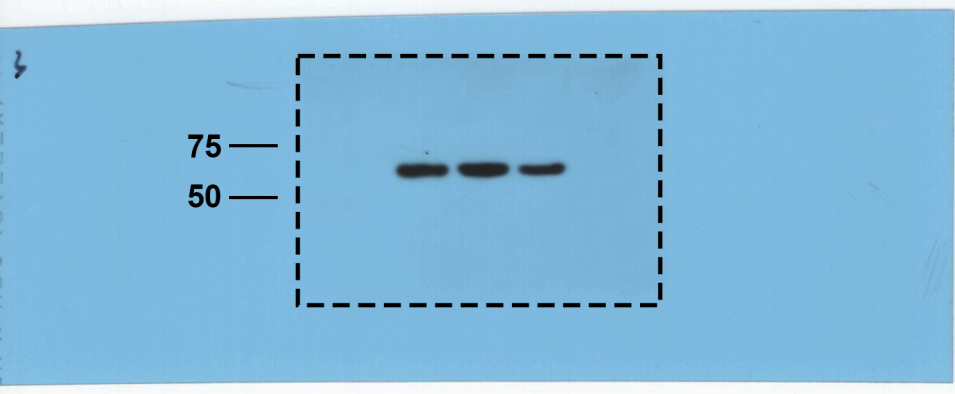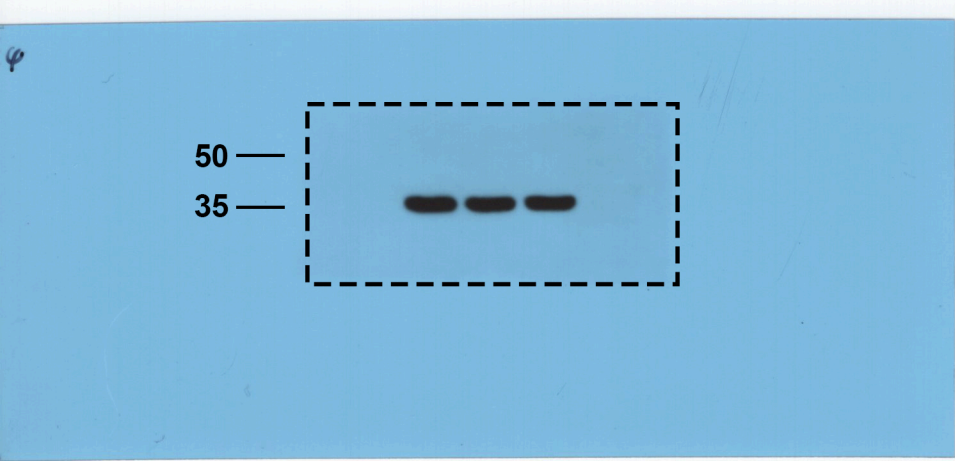

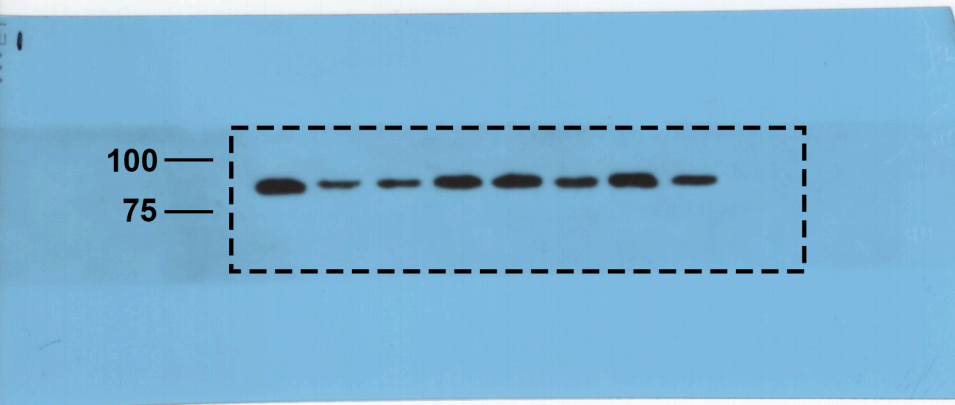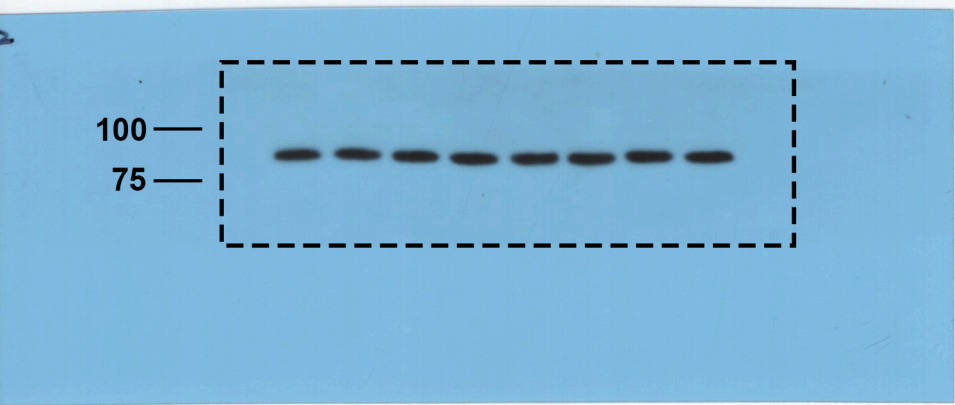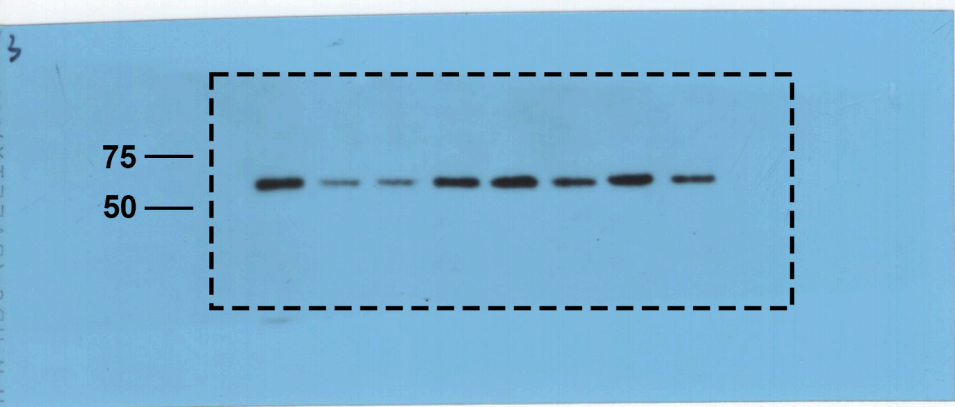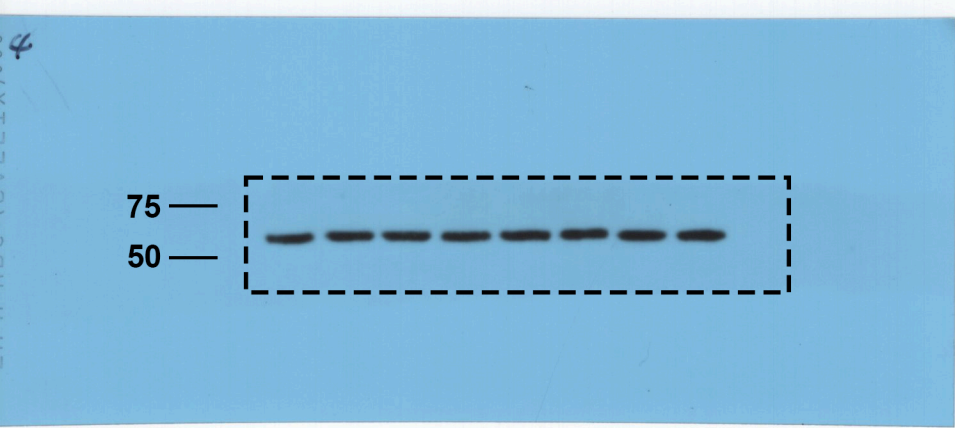

300 —  
250 —

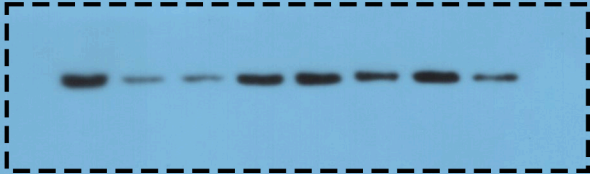

p-mTOR  
289 kDa

300 —  
250 —

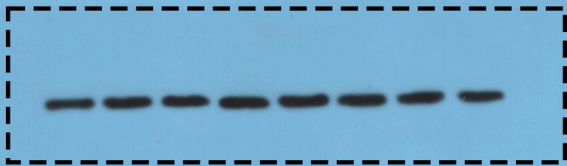

mTOR  
289 kDa

50 —  
35 —

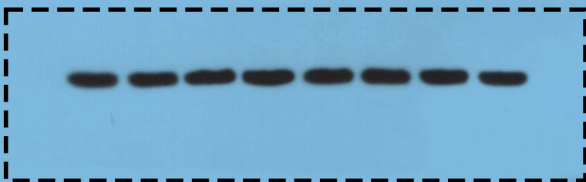

GAPDH  
37 kDa

100 —  
75 —

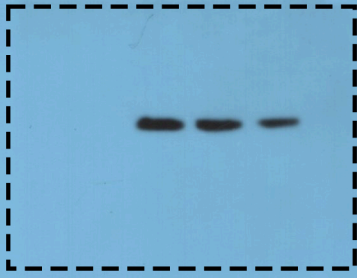

p-PI3K  
84 kDa

100 —  
75 —

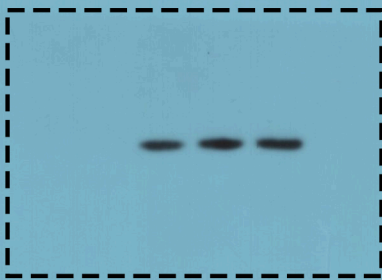

PI3K  
84 kDa

75 —  
50 —

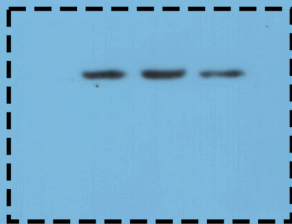

P-AKT  
56 kDa

75 —  
50 —

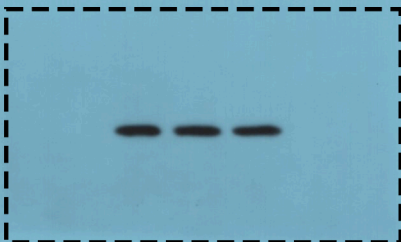

AKT  
56 kDa

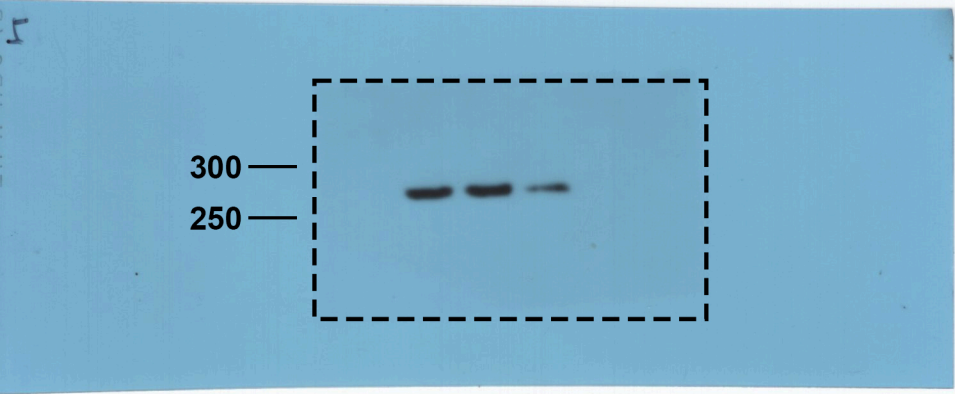

**p-mTOR**  
**289 kDa**

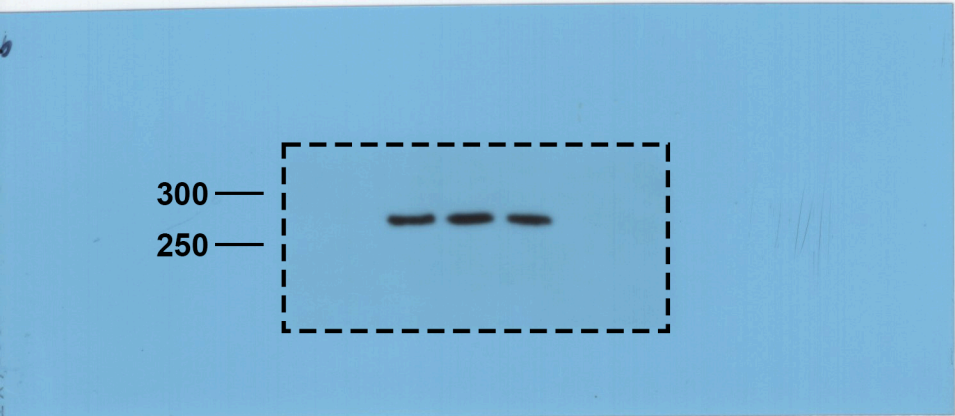

**mTOR**  
**289 kDa**

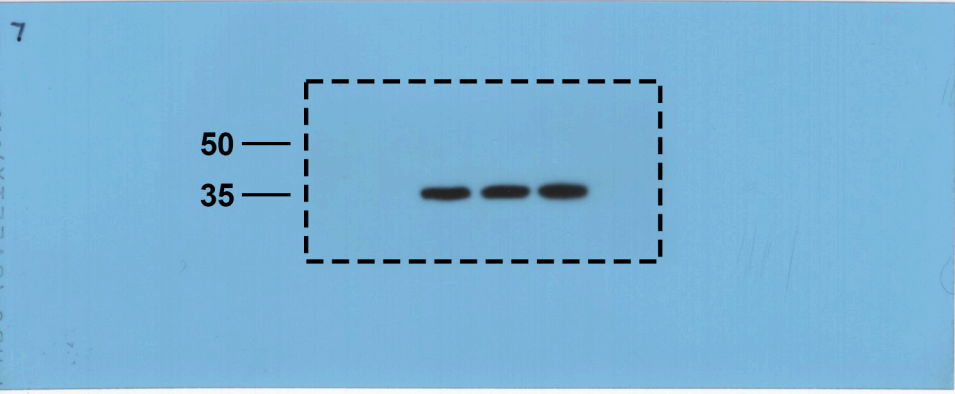

**GAPDH**  
**37 kDa**

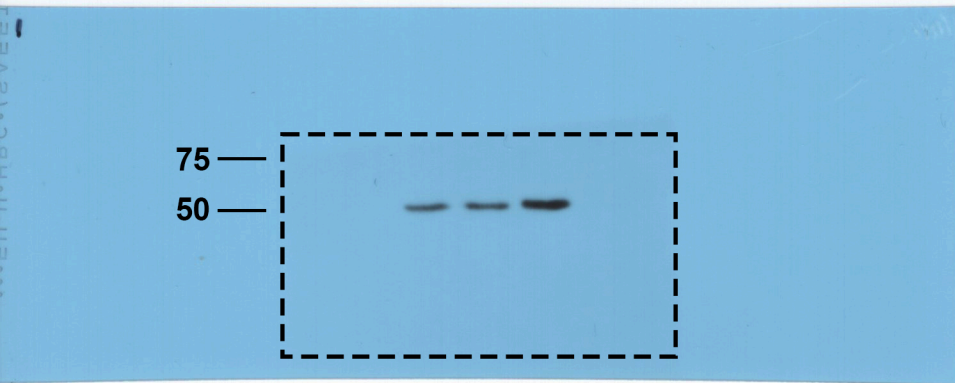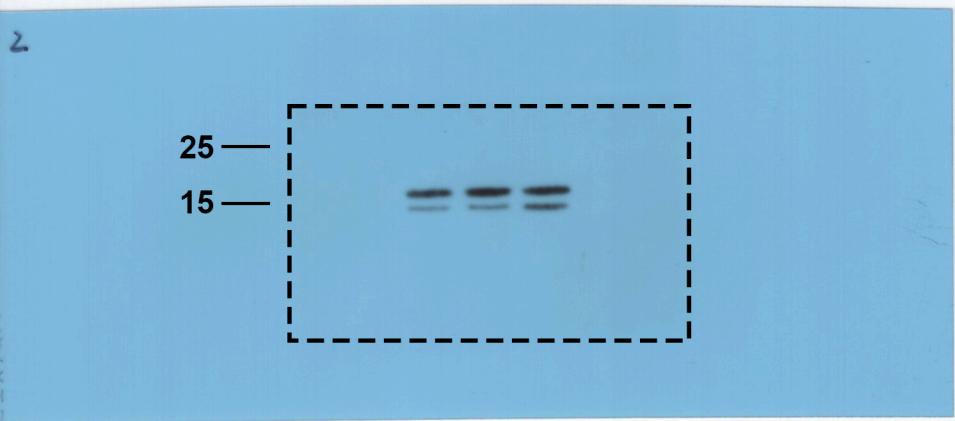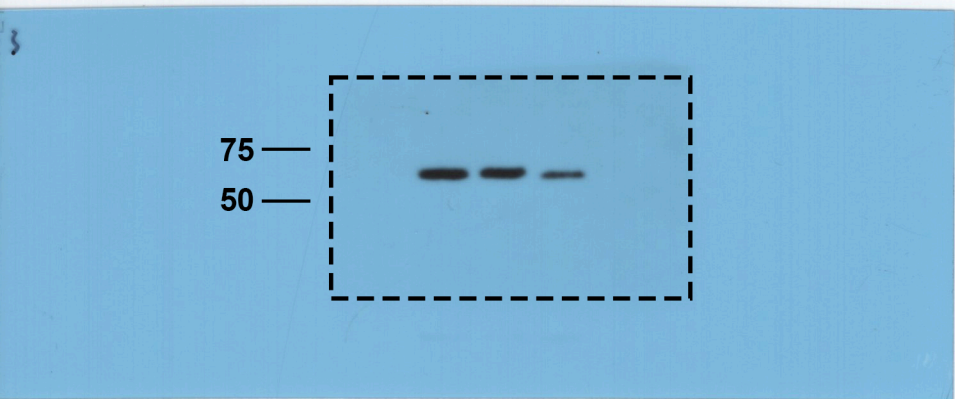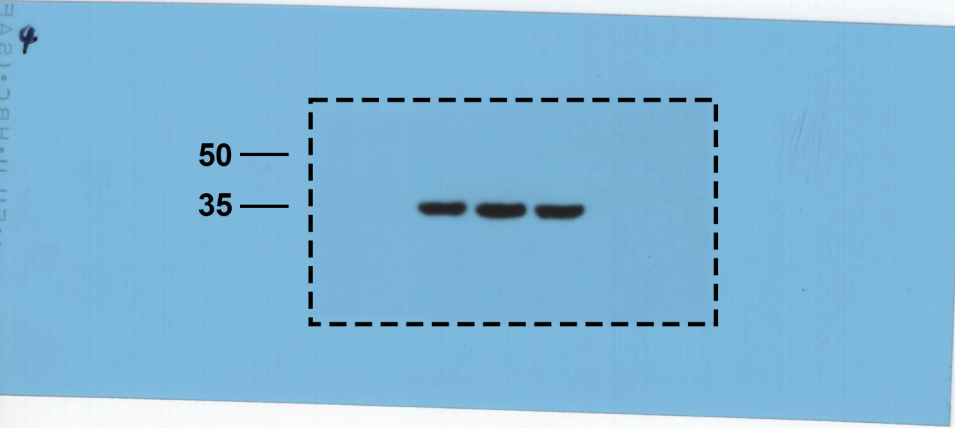

Supplement: 12905_2022_2056_MOESM1_ESM.pdf [file 12905_2022_2056_MOESM1_ESM.pdf]
